# Supplementary material for: Guanine chemiluminescent biosensor capable of rapidly sensing mercury in a sample
Source: Royal Society of Chemistry journal article supplement (doi:10.1039/c5ra17407d), 2015-01-01
Supplement: c5ra17407d1.pdf [file c5ra17407d1.pdf]

Electronic Supplementary Information (ESI)

**Guanine Chemiluminescent Biosensor capable of rapidly sensing mercury in a sample**

M. Kwon,<sup>†</sup> Y. Park,<sup>†</sup> and J. H. Lee

*Luminescent MD, LLC, Hagerstown, Maryland 21742, United States*

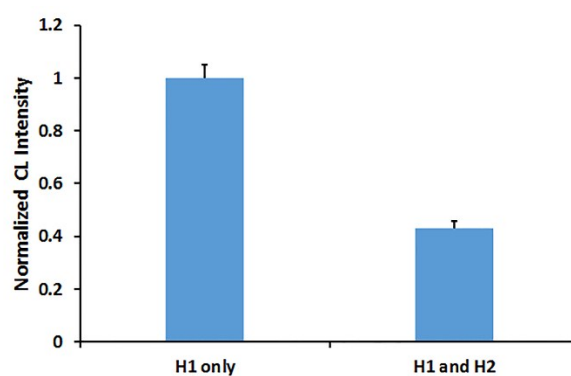

**Fig. S1** Comparison of light emitted in the presence of H1 only and the mixture after the hybridization of H1 and H2 for 40 min at room temperature.

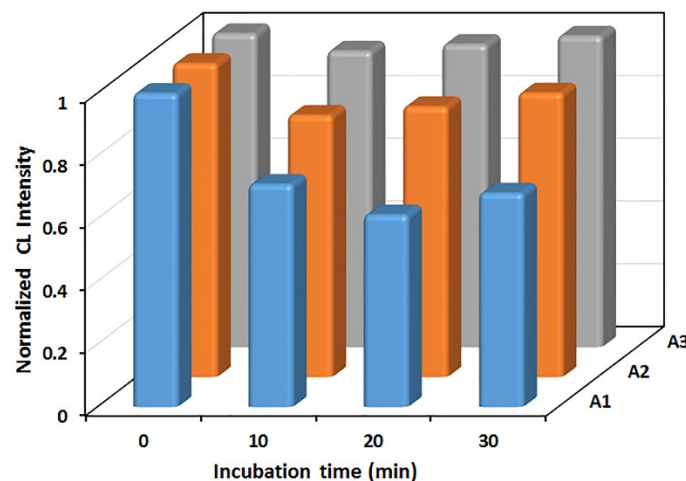

**Fig. S2** Interaction between  $\text{Hg}^{2+}$  and T- $\text{Hg}^{2+}$ -T hairpin-DNA (e.g., A1, A2, A3) under the different incubation times.

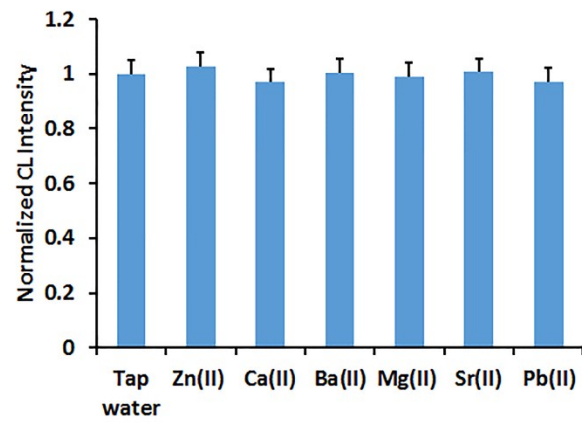

**Fig. S3** No interaction between T-Hg<sup>2+</sup>-T hairpin-DNA (e.g., A1) and the metals (3  $\mu$ M) spiked in tap water.
